# Supplementary material for: Continuous Estimation of Cardiac Output in Critical Care: A Noninvasive Method Based on Pulse Wave Transit Time Compared with Transpulmonary Thermodilution
Source: Hindawi journal article supplement (doi:10.1155/2020/8956372), 2020-07-20
Supplement: f1 [file 8956372.f1.pdf]

| Number | sex, M/F | Age (year) | weight (kg) | height (cm) | Major problem (Sepsis (1), Polytrauma (2), Non) | SAPS II | PiCCO/Map (mmHg) | skin (yes (1), no (0)) | Neurology (yes (1), no (0)) | Liver (yes (1), no (0)) | Kidney (yes (1), no (0)) | Lung (yes (1), no (0)) | Heart (yes (1), no (0)) | Diagnosis | PM1 | PM2 | PM3 | PM4 | PM5 | PM6 | VM1 | VM2 | VM3 | VM4 | VM5 | VM6 |
|--------|----------|------------|-------------|-------------|-------------------------------------------------|---------|------------------|------------------------|-----------------------------|-------------------------|--------------------------|------------------------|-------------------------|-----------|-----|-----|-----|-----|-----|-----|-----|-----|-----|-----|-----|-----|
| 1      | 51 f     | 58         | 165         | 165         | 3                                               | 7       | 0                | 0                      | 1                           | 1                       | 0                        | 0                      | 0                       | 65        | 24  |     |     |     |     |     |     |     |     |     |     |     |
| 2      | 78 f     | 75         | 152         | 1           | 3                                               | 3       | 0                | 1                      | 1                           | 0                       | 0                        | 0                      | 0                       | 75        | 77  |     |     |     |     |     |     |     |     |     |     |     |
| 3      | 56 m     | 90         | 180         | 1           | 9                                               | 1       | 0                | 1                      | 0                           | 0                       | 0                        | 0                      | 0                       | 70        | 37  |     |     |     |     |     |     |     |     |     |     |     |
| 4      | 59 m     | 83         | 176         | 3           | 1                                               | 1       | 1                | 1                      | 0                           | 0                       | 1                        | 0                      | 0                       | 80        | 30  |     |     |     |     |     |     |     |     |     |     |     |
| 5      | 67 f     | 53         | 160         | 3           | 15                                              | 0       | 1                | 1                      | 0                           | 1                       | 0                        | 0                      | 0                       | 95        | 49  |     |     |     |     |     |     |     |     |     |     |     |
| 6      | 51 m     | 88         | 180         | 2           | 2                                               | 3       | 0                | 0                      | 0                           | 0                       | 0                        | 0                      | 0                       | 90        | 52  |     |     |     |     |     |     |     |     |     |     |     |
| 7      | 36 m     | 58         | 174         | 2           | 2                                               | 2       | 0                | 0                      | 1                           | 0                       | 0                        | 0                      | 0                       | 60        | 13  |     |     |     |     |     |     |     |     |     |     |     |
| 8      | 82 m     | 72         | 176         | 4           | 3                                               | 3       | 0                | 1                      | 0                           | 0                       | 0                        | 0                      | 0                       | 95        | 65  |     |     |     |     |     |     |     |     |     |     |     |
| 9      | 69 m     | 80         | 178         | 2           | 5                                               | 5       | 0                | 1                      | 0                           | 0                       | 0                        | 0                      | 0                       | 80        | 47  |     |     |     |     |     |     |     |     |     |     |     |
| 10     | 44 f     | 55         | 172         | 3           | 4                                               | 4       | 0                | 0                      | 0                           | 0                       | 1                        | 0                      | 0                       | 97        | 40  |     |     |     |     |     |     |     |     |     |     |     |
| 11     | 82 f     | 100        | 155         | 3           | 3                                               | 3       | 1                | 0                      | 1                           | 0                       | 0                        | 0                      | 0                       | 70        | 50  |     |     |     |     |     |     |     |     |     |     |     |
| 12     | 69 m     | 84         | 168         | 3           | 1                                               | 1       | 1                | 1                      | 0                           | 0                       | 1                        | 0                      | 0                       | 94        | 42  |     |     |     |     |     |     |     |     |     |     |     |
| 13     | 71 f     | 51         | 158         | 1           | 4                                               | 4       | 1                | 0                      | 1                           | 0                       | 0                        | 0                      | 0                       | 72        | 61  |     |     |     |     |     |     |     |     |     |     |     |
| 14     | 85 m     | 82         | 171         | 1           | 2                                               | 2       | 1                | 0                      | 1                           | 0                       | 0                        | 0                      | 0                       | 95        | 42  |     |     |     |     |     |     |     |     |     |     |     |
| 15     | 72 m     | 79         | 175         | 3           | 16                                              | 16      | 1                | 1                      | 0                           | 0                       | 0                        | 0                      | 0                       | 70        | 30  |     |     |     |     |     |     |     |     |     |     |     |
| 16     | 69 m     | 90         | 186         | 3           | 13                                              | 13      | 1                | 1                      | 0                           | 0                       | 1                        | 0                      | 0                       | 85        | 31  |     |     |     |     |     |     |     |     |     |     |     |
| 17     | 50 m     | 110        | 195         | 1           | 12                                              | 12      | 0                | 0                      | 0                           | 0                       | 0                        | 1                      | 0                       | 80        | 32  |     |     |     |     |     |     |     |     |     |     |     |
| 18     | 81 m     | 90         | 160         | 1           | 15                                              | 15      | 1                | 1                      | 0                           | 0                       | 0                        | 0                      | 0                       | 65        | 38  |     |     |     |     |     |     |     |     |     |     |     |
| 19     | 43 m     | 75         | 186         | 3           | 5                                               | 5       | 0                | 0                      | 0                           | 0                       | 1                        | 0                      | 0                       | 100       | 54  |     |     |     |     |     |     |     |     |     |     |     |
| 20     | 71 f     | 68         | 160         | 3           | 14                                              | 14      | 0                | 0                      | 1                           | 0                       | 0                        | 0                      | 1                       | 60        | 48  |     |     |     |     |     |     |     |     |     |     |     |
| 21     | 63 f     | 78         | 174         | 1           | 5                                               | 5       | 0                | 1                      | 1                           | 1                       | 0                        | 0                      | 0                       | 85        | 61  |     |     |     |     |     |     |     |     |     |     |     |
| 22     | 73 f     | 70         | 157         | 1           | 4                                               | 4       | 1                | 0                      | 1                           | 0                       | 0                        | 0                      | 0                       | 65        | 24  |     |     |     |     |     |     |     |     |     |     |     |
| 23     | 78 m     | 70         | 195         | 3           | 15                                              | 15      | 0                | 1                      | 0                           | 0                       | 1                        | 1                      | 0                       | 70        | 52  |     |     |     |     |     |     |     |     |     |     |     |
| 24     | 47 m     | 81         | 186         | 2           | 1                                               | 1       | 0                | 0                      | 0                           | 0                       | 0                        | 0                      | 0                       | 74        | 55  |     |     |     |     |     |     |     |     |     |     |     |
| 25     | 58 m     | 90         | 190         | 2           | 7                                               | 7       | 0                | 1                      | 0                           | 0                       | 1                        | 0                      | 0                       | 70        | 25  |     |     |     |     |     |     |     |     |     |     |     |
| 26     | 47 m     | 81         | 177         | 3           | 7                                               | 7       | 1                | 1                      | 1                           | 1                       | 0                        | 1                      | 0                       | 70        | 34  |     |     |     |     |     |     |     |     |     |     |     |
| 27     | 63 f     | 40         | 150         | 3           | 3                                               | 3       | 1                | 0                      | 1                           | 0                       | 0                        | 0                      | 0                       | 75        | 60  |     |     |     |     |     |     |     |     |     |     |     |
| 28     | 81 m     | 71         | 180         | 2           | 4                                               | 4       | 1                | 0                      | 0                           | 0                       | 0                        | 0                      | 0                       | 86        | 26  |     |     |     |     |     |     |     |     |     |     |     |
| 29     | 72 m     | 72         | 176         | 3           | 1                                               | 1       | 0                | 0                      | 0                           | 0                       | 1                        | 0                      | 0                       | 85        | 38  |     |     |     |     |     |     |     |     |     |     |     |
| 30     | 32 m     | 150        | 170         | 1           | 1                                               | 1       | 0                | 0                      | 0                           | 1                       | 0                        | 0                      | 0                       | 93        | 17  |     |     |     |     |     |     |     |     |     |     |     |
| 31     | 62 m     | 80         | 175         | 1           | 1                                               | 1       | 0                | 0                      | 0                           | 0                       | 0                        | 0                      | 0                       | 60        | 41  |     |     |     |     |     |     |     |     |     |     |     |
| 32     | 55 m     | 75         | 172         | 1           | 14                                              | 14      | 0                | 0                      | 1                           | 1                       | 0                        | 0                      | 0                       | 75        | 33  |     |     |     |     |     |     |     |     |     |     |     |
| 33     | 62 m     | 70         | 170         | 2           | 9                                               | 9       | 1                | 0                      | 0                           | 0                       | 0                        | 0                      | 0                       | 70        | 35  |     |     |     |     |     |     |     |     |     |     |     |
| 34     | 59 f     | 80         | 170         | 1           | 6                                               | 6       | 0                | 1                      | 1                           | 0                       | 0                        | 0                      | 0                       | 70        | 56  |     |     |     |     |     |     |     |     |     |     |     |
| 35     | 31 m     | 94         | 194         | 1           | 1                                               | 1       | 1                | 0                      | 0                           | 1                       | 1                        | 0                      | 0                       | 61        | 50  |     |     |     |     |     |     |     |     |     |     |     |
| 36     | 40 m     | 105        | 196         | 3           | 3                                               | 3       | 0                | 0                      | 0                           | 1                       | 0                        | 0                      | 0                       | 73        | 49  |     |     |     |     |     |     |     |     |     |     |     |
| 37     | 72 m     | 100        | 188         | 3           | 2                                               | 2       | 1                | 0                      | 1                           | 0                       | 0                        | 0                      | 0                       | 81        | 85  |     |     |     |     |     |     |     |     |     |     |     |
| 38     | 22 f     | 67         | 176         | 1           | 2                                               | 2       | 0                | 1                      | 1                           | 1                       | 0                        | 0                      | 0                       | 70        | 53  |     |     |     |     |     |     |     |     |     |     |     |
| 39     | 50 m     | 72         | 176         | 3           | 1                                               | 1       | 0                | 0                      | 0                           | 0                       | 1                        | 0                      | 0                       | 80        | 47  |     |     |     |     |     |     |     |     |     |     |     |
| 40     | 53 m     | 75         | 180         | 3           | 5                                               | 5       | 0                | 1                      | 1                           | 0                       | 0                        | 0                      | 1                       | 79        | 36  |     |     |     |     |     |     |     |     |     |     |     |

| Variable name: | Method                            | investigator | time point       |
|----------------|-----------------------------------|--------------|------------------|
| PM1            | Cardiac output estimate by PiCCO™ | 1            | baseline         |
| PM2            | Cardiac output estimate by PiCCO™ | 2            | baseline         |
| PM3            | Cardiac output estimate by PiCCO™ | 1            | 2h post baseline |
| PM4            | Cardiac output estimate by PiCCO™ | 1            | 4h post baseline |
| PM5            | Cardiac output estimate by PiCCO™ | 1            | 6h post baseline |
| PM6            | Cardiac output estimate by PiCCO™ | 1            | 8h post baseline |
| VM1            | Cardiac output estimate by Vismo™ | 1            | baseline         |
| VM2            | Cardiac output estimate by Vismo™ | 2            | baseline         |
| VM3            | Cardiac output estimate by Vismo™ | 1            | 2h post baseline |
| VM4            | Cardiac output estimate by Vismo™ | 1            | 4h post baseline |
| VM5            | Cardiac output estimate by Vismo™ | 1            | 6h post baseline |
| VM6            | Cardiac output estimate by Vismo™ | 1            | 8h post baseline |
